# Supplementary material for: Estimating sensitivity of the Kato-Katz technique for the diagnosis of Schistosoma mansoni and hookworm in relation to infection intensity
Source: PLoS Negl Trop Dis. 2017 Oct 4;11(10):e0005953. doi: 10.1371/journal.pntd.0005953 (PMC5643140; doi:10.1371/journal.pntd.0005953)
Supplement: S1 Table — (XLSX) [file pntd.0005953.s002.xlsx]

## Sheet: Zouatta
age	sm1	sm2	sm3	an1	an2	an3			village	Zouatta
75	0	0	1	0	0	0		key:	age	age of individual in years
45									smx	S. mansoni egg count of Kato-Katz slide of sample x
22	2		1	0		0			anx	Hookworm egg count of Kato-Katz slide of sample x
19	2		1	0		0
15
10	1	1	2	0	37	12
7	0	0	1	0	0	0
0.5	0		0	0		0
4	0	0	0	0	0
20		0			0
59	0	0	1	0	0	0
45	0	0	2	0	0	8
37	0	1	4	0	0	0
16
9	0	0	0	0	0	0
8	0	0	0	0	0	0
7	0	0	0	0	0	0
4	0	0	0	0	0	0
1	0	0	0	0	0	0
12	15	16	0	6	4	7
10	4	14	17	0	0	0
9	0	0	0	0	0	13
50	12	0	2	78	0	4
55	0	0	0	26	0	10
10	0	0	0	0	0	27
7	0	0	0	10	0	4
70	0	0	0	0	0	31
72	0	5	2	0	0	0
74	10	0	5	0	0	4
64	28	11	13	0	0	11
3	0	0	0	0	0	0
1.5	0	0		0	0
25	0	0	0	3	0	34
26	56	15	23	0	0	7
22	0	0	6	0	0	8
39	0	87	0	0	0	0
22	0	0	0	0	0	0
10	0	0	1	0	0	0
6	0	0	0	0	0	0
3	0	0	0	0	0	0
40	3	0		2	0
32		13	6		0	0
8	0	0		0	0
4	0		0	0		0
2	0	0		0	0
65	3			0
29	0			0
7	0			0
42	0	0	0	3	0	78
32	0		3	0		0
4	0		0	0		0
76	0	0	1	0	0	0
21	2	0	1	0	0	0
90	0	0	0	0	0	0
52	13	27	33	0	0	0
8	0	0	0	0	0	6
17	0	7	4	0	0	0
10	1	1	4	0	0	0
9	0	0	0	13	0	0
2	0	0	0	0	0	0
0.583	0	0	0	0	0	0
11	0	0	0	0	0	0
73	0	0	0	0	0	0
66	2	0	2	0	0	0
36	21	19	32	0	2	57
11	0	0	0	0	0	0
7	0	0	0	0	0	0
8	0	0	0	0	0	0
5	0	0	0	0	0	0
46	0	0	0	5	0	0
12	0	0	0	0	0	0
8	0	0	0	0	0	0
34	0			0
32	0	0	0	4	0	0
70	0	0	0	0	0	0
52	0	0	0	0	0	0
42	0	5	0	0	0	0
3	0	0	0	0	0	0
18	0		0	0		0
5		0	0		0	0
49	0	0		37	63
42	300	86	104	0	0	0
11	0	0	0	0	0	0
10	0	0	0	0	0	0
5	3			0
3
17
21
32	0			0
27
66	0	0		0	0
61	0	8	4	0	0	139
48	0	0	0	0	0	0
56	0		0	0		0
27	0	3	0	0	0	0
19	0	0	0	0	0	0
10	0	0	0	0	0	9
6	0	0	0	0	0	0
7	0	0		0	0	0
6	0	0	0	0	0	0
5	0	0	0	0	0	0
2	0	0	0	0	0	0
35
22		11	9		13	13
47	0	0	0	0	2	0
26	23	27	48	0	0	0
15	0	0	9	0	0	0
65	2	0	10	0	25	0
37	0	0	0	0	0	0
7	0	0	0	0	0	0
6	0	0	0	0	0	0
34	0	8	6	0	7	0
25	2	0	0	0	0	0
3	0	0	0	0	0	0
1.5	0	0	0	0	0	0
54	28	86	5	0	278	0
27	13	0	21	0	0	112
34	0	0	0	0	0	0
4	0	0	0	0	0	0
62	0	0	0	0	0	0
39	0	0	0		0	3
45	0		0	0		52
27	0	1	0	0	0	0
36	0	0	0	0	0	0
5	0	0	0	0	7	11
42	0	0	0	5	0	18
34	0	0	0	0	0	0
7	1	0	0	0	0	12
6	1	0	0	0	0	11
5	0	0	0	0	0	0
0.167	0	0	0	0	0	0
34	0	0	0	0	0	0
3	0	0	0	0	0	0
13	0	0	0	0	0
13	0	0	0	0	0	0
74	0	0	0	0	0	0
2	0	0	0	0	0	0
32	16	1	11	0	0	31
17	3	8	0	0	0	0
1	0	0	0	0	0	0
56	17	0	0	0	3	7
15	2	6	4	0	37	10
78	0	0	0	0	0	5
63	0	0	0	0	0	9
23	12	11	25	2	0	13
1.25	0	0	0	0	0	0
2	0	0	0	0	0	0
6	0	0		0	0
27	0	13	27	12	0	13
23	1	1	0	0	0	0
1.5			0			0
45		0	0		0
35	0	0	2	0	0	0
6	0	0	0	0	2	0
5	1	0	0	0	0	0
3	0	0	0	0	0	0
0.333	0	0	0	0	0	0
39	0	3	3	37	0	234
27	0	0	0	4	0	0
11	0	0	0	0	0	0
9	0	0	0	0	0	0
7	0	1	0	0	0
5	0	0	0	0	0	0
1.667		0	0			0
53	0	0	0	0	0	0
40	0	0	0	0	42	26
36	0	0	0	0	0	0
14	0	2	0	0	0	0
11	0	0	0	0	0	2
2	0	0	0	0	0	0
2	0	0	0	0	0	0
3	0	0	0	0	0	0
14	2	0	2	0	0	0
59	0	0	0	0	0	0
22	6	1	21	0	0	2
3	0	0	0	0	0	0
59	0	0	0	0	0	0
57	2	2	4	0	0	0
22	1	0	3	1	0	0
1.167	0	0	0	0	0	0
15	0	2	2	0	0	13
20	38	12	7	0	18	35
63	1	6	4	0	0	55
63	0	0	0	0	34	15
18	2	4	2	0	0	0
20	12	13	17	0	0	0
11	0	0	0	0	9	0
39	0	0	0	0	45	11
3	0	0	0	0	0	0
2	0	0	0	0	0	0
39	0	0	0	0	0	0
13	19	30	5	0	12	21
12	0	0	0	0	0	0
7	0	0	1	0	35	46
62	0	0	0	0	0	0
31	0	0	0	0	0	0
12	0	0	0	0	0	0
7	0	0	0	0	0	0
3	0	0	0	7	0	0
14
0.167	0	0		0	0
49
91	0	0	0	0	0	0
60	2	27	15	0	0	0
49	3	10	6	0	7	27
27	1	37	9	0	8	5
16	3	6	3	0	19	12
10	0	0	1	0	0	0
59	0	0	0	0	0	0
65	3	5	5	0	0	0
24	0	0	0	0	5	0
52	0	0	0	0	0	0
50			0			0
75	0	0	0	0	10	7
29	8	13	4	21	4	0
25	0	1		0	0	0
25	4	4	3	0	0	0
19	17	7	11	0	0	0
6	0	0	0	0	0	0
45	1	0		0	6
35
30	18	19	68	0	0	0
28	15	2	2	0	0	9
22	23	2	12	0	0	0
22	0	2		0	0
12	0			0
1	0	0		0	0
56	13	0	19	0	0	4
40			1			4
32		0	1		0	0
15
22
10		0	0		0	168
7	0	0	0	0	0	0
2	0	0	0	0	0	0
3	0	0	0	0	0	0
18		6	5		0	0
39		1			0
37	0	0		0	0
2	0	0		0	0
32	3	0		0	2
9	0	0		0	0
37	0	0	0	0	0	9
17	0	0	0	0	0	0
38	0		0	0		0
16
12	0	0	0	0	0	16
10
7	0	1	0	13	0	0
3	0	0	0	0	0	0
49	1	0	0	3	0	0
35
9	0	0	0	0	0	9
7	0	0	0	0	0	0
3	0	0	0	0	0	0
3	0	0	2	0	0	0
30	7	0	1	0	0	0
8	0	1	0	0	0	0
6	0	1	0	1	0	0
1	0	0	0	0	0	5
81	0	0	0	0	0	0
37	0	0	0	48	48	0
30	7	1	0	17	0	5
70	0	0	0	0	0	0
38	0	0	0	5	0	5
11	0	1	4	0	0	0
7	0	0	0	0	0	0
2	0	0	0	0	0	0
38	0	1	1	0	9	28
26	9	0	10	0	0	0
27	1	0	0	0	25	59
11	10	5	6	0	0	1
12	0	0	0	0	0	0
55	0	0	0	4	0	0
40		0	0		0	0
17		0	0		0	0
12		0	0		0	0
10		0	0		0	0
9		0	0		0	0
60	101	13	18	13	5	23
57	0	1	1	0	5	0
22	4	4	1	44	0	4
9	0	0	0	0	0	7
47	0	0	0	0	0	0
10	1	0	0	0	0
40		0	3		0	24
25	0	0	0	0	7	0
3	0	0	0	0	0	0
1	0	0	0	0	0	0
8		0			0
43	0		0	67		36
30	0	0	1	0	0	5
6	0	0	0	0	0	0
5	0	0		0	0
2	0	0	0	0	0	0
39	0	0	3	0	0	0
27		0	0		0	0
20	0	0	0	0	0
0.167	0		0	0		0
58
44		2	2		0	0
20	1		0	0		0
22	26		7	0		0
9
7		0	0		0	0
14		0	0		6	0
15	48	17	19	0	0	0
39	0	0	0	0	3	0
31	0	0	0	0	0	0
6	0	0	0	0	0	0
25	0	0	0	0	0	0
6	4	0	12	0	0	19
49	0	6	0	0	0	0
58	0	0	5	2	96	7
30	0	0	0	24	0	13
40	0	0	3	0	0	0
3	0	0	0	0	0	0
18
16
49	0	0	0	0	0	79
40	2	2	0	0	14	0
11		4	2	0	0	11
9		0	0		0	0
5	0	0	0	7	0	8
76	0	0	0	0	0	0
72	0	0	0	0	0	0
49	0	0	0	0	0	0
20
16	1	3	3	0	0	0
12	1	1	0	4	0	0
12	0	0	0	0	0	0
5	0	0	0	0	0	0
51	0	0	1	0	0	0
30	0	0	0	0	0	26
17	0	0	4	39	0	36
6	0	0	0	0	0	0
0.333	0	0	0	0	0	0
68	0	1	0	0	0	0
24	7	2	7	0	0	0
27	0	1	0	0	0	0
2
64	4	1	0	3	0	0
53	12	23	27	0	65	0
35	4	1	0	0	0	0
30	43	4	106	0	0	0
23	1		0	0		0
20	29	6	13	15	0	0
9	0	0		0	0
20	4		6	26		0
25	0		5	0		0
1	0	0	0	0	0	0
6	0	0	0	0	0	0
3	0	0	0	0	0	0
4		0	0		0	0
4	0	1	0	3	0	0
0.083		0	0		0	0
25
27
39	0	0	0	15	0	0
28
9	0	0	0	0	0	0
9
5
1
45	0	0	0	0	0	0
58
44	1	0	0	0	0	0
15	4	5	3	0	0	7
11	1	0	2	0	0	0
8	0	1	1	0	0	0
6	0	0	0	0	0	0
3	0	0	0	0	0	0
40	0	0	0	0	0	0
10	3	1	6	21	5	4
14	8	0	11	0	0	0
11	0	0	0	0	0	0
6	0	0	1	0	0	0
1	0		0	0		0
27	1	0	24	38	0	29
28	0	0	0	0	0	0
1	0	0	0	0	0	0
12	0	0	0	0	0	0
4	0	0	0	0	0	0
6	0	0	0	0	0	0
23		3	0		0	12
130
62	0	0	0	0	9	23
21	0	8		0	3
17	0	8	2	23	9	15
13	4	3	0	0	17	25
4	0	0	0	0	0	0
6	0	0	1	0	0	0
69	0	0	0	4	2	5
10		0	0		0	0
23	0	0	0	0	0	0
27		0	0		0	0
2		0	0		0	0
57	0	0	0	0	0	0
27	0	0	0	0	0	0
57	11	21	8	104	81	0
30	0	0	0	0	0	0
6	2	8	0	0	0	0
4	0	0	0	0	8	0
49	0	0	1	0	0	0
25	7	19	25	0	2	0
15		2	1		0	0
62	1	0	0	0	0	0
30	0	2	3	4	0	0
40	0	0	0	0	0	0
23	0	0	0	0	0	0
4	0	0	0	0	2	0
38	2	1	3	0	0	0
35	0	0	0	3	0	0
19	19	3	2	1	0	0
13	0	0	0	7	0	7
17	4	0	0	10	0	7
9	0	0	0	0	0	0
7	0	0	0	0	0	0
11	0	0	0	0	0	0
50			2			4
34	18	7		0	0
7	0	0		0	0
48	0	0	0	0	0	0
25	1	0	0	0	0	0
8	0	0	0	0	0	0
6	0	0	0	0	0	0
4	0	1	0	0	0	0
2	0	0	0	0	0	0
0.039		0	0		0	0
63	0	2	2	42	35	0
55		2	0		0	0
28	0	0	0	7	0	0
38	0	0	0	0	0	0
32	0	0	0	0	0	0
8	0	0	0	0	0	0
4	0	0	0	0	0	0
0.5		0	0		0	0
36	0	0	0	0	0	0
32	1	5	4	0	0	0
13	0	0	0	0	0	0
20	0	0	0	0	0	0
8	0	0	0	0	0	0
6	0		0	0		0
3		0	0		0	0
4	0	0	0	0	0	0
18	0	0	0	3	0	2
8		0	0		14	33
8	2	0	0	11	0	6
57	0	0	0	0	0	0
25	1	0	0	0	0	0
19	0	0	0	0	0	0
11	0	0	0	0	0	0
37	0	1		0	0
31	0	0	0	0	0	0
12	0	0	0	0	0
11	0	1	0	0	0	0
8	0	0	0	0	3	0
5	0	0	0	0	0	0
0.917	0	0	0	0	0
12	0	0	0	0	56	0
12	0	0	0	0	0	0
42	0	0	0	0	0	0
30	0	0	0	0	0	0
8	0	0	0	0	0	0
12	0	0	0	0	0	0
14	3	0	0	0	0	68
30	9	3	7	0	0	0
45	0	2	0	8	3	0
21
17	2	2	4	7	4	5
15	3	1		0	0
14	0	2	2	26	38	15
7	0	0	0	2	7	2
22	13	8	7	26	12	26
36	0	0	0	1	53	0
29	3	0	0	0	0	0
16	0	0	0	15	0	0
12	0	0	0	2	1	1
10	0	0	0	0	0	0
8		0	0	0	0	0
7	0		0	0		0
4	0	0	0	0	0	0
1	0	0	0	0	0	0
12	132	21	1	0	47	4
38	42	2	2	0	0	3
33
22	32	6	6	39	10	14
17
22	0	5	1	0	13	0
21	2	3	5	5	4	10
2	0	0	0	0	0	0
4	7	12	6	34	20	18
59	3	2	19	2	0	0
40		7	2		8	0
27	13	12	42	0	0	0
22	0	0	0	13	23	17
0.417	0	0		0	0
10	0	7	1	27	11	6
7	0	0	0	0	57	34
69	16	0	1	49	15	0
50
47	21	10	5	0	0	9
20	78	32	89	0	0	0
4	0	0	0	0	0	0
0.833	0	0	0	0	0	0
35	0	0	0	0	0	0
23	23	12	4	2	0	0
1	0	0	0	0	0	0
60	0	1	0	0	734	287
40	0	9	0	87	13	0
10	0		0	156		13
35	0		0	7		14
9	0		0	0		0
0.417	0	4	0	0	0	0
20	5	0		0	0
4	0	0	0	0	0	0
11	1	0	0	0	0	0
6	0	0	0	11	0	0
10		0	0		0	7
3	0	0	0	0	0	0
1	0	0		0	0
20
15	0		0	0		0
19
2
33	0	0	0	18	63	5
25	0	19		0	54
15	5		4	410		2
12	0	0	0	114	107	102
10	0	0	1	0	25	8
78
70	0	0	0	0	0	0
11	44	12	3	41	8	0
15	11		3	27		0
8	0	1		0	0
8	0	0	0	19	126	68
6	0	4	3	0	0	0
6	0	2	2	0	0	0
4	0	0	1	0	0	0
30	0	0		0	0	0
28	0	0	1	0	17	8
10	0	0	0	0	0	0
9	0	0	0	0	0	0
2		0	0		0	0
0.014	0		0	0		0
26	0	0	0	0	11	19
52	0	3	0	1	54	8
42	0	4	1	0	7	8
8	0	0	0	0	0	0
5	0	0	0	0	0	8
3	0	0	0	0	0	0
24	3	1		0	1
44	0	1		0	18
40	0	0	0	0	23	4
13	0		13	2		6
4	0	0	0	0	0	0
6	0	0	0	0	1	5
77			0			0
40	3	10	0	0	0	0
31	0	0	0	0	3	0
12	0	1	0	6	38	94
5	0			0
2	0	0	0	0	0	0
22	0	11	3	4	13	10
18	0	0	2	2	9	13
1	0	0	0	0	0	0
42	1	1	1	0	2	15
39	0	0	0	0	0	0
21
16	0	1		0	0
14	0	1	1	0	0	0
11	0	0	0	0	0	0
6	0	0	0	0	0	0
3	0	0	0	0	0	0
67	0	0	0	0	0	0
57	2	9	3	0	0	0
43	0	0	0	0	0	0
17	6	0	0	0	0	0
10	1	0	0	0	0	0
37	0	0	0	0	0	0
31	0	0	0	0	0	0
9	0	0	0	0	0	46
6	0	0	0	0	0	0
33	0	0	0	0	0	0
26	0	0	0	0	0	0
11	0	0	0	0	0	0
9	0	0	0	0	0	0
11	12	10	7	15	0	0
43	0	3	4	2	0	0
33	0	0	13	0	0	0
24	0	2	8	0	0	47
16	0	1	3	0	0	42
12	0	0	0	0	16	0
21	14	27	7	0	0	0
20	0	0	0	0	0	0
18	0	0	0	0	0	0
58	0		0	2		0
4	0	0	0	0	0	0
8	48	26	16	0	0	37
34	1	3	12	7	0	0
20

## Sheet: Azaguie
Age	Hw1	Sm1	Hw2	Sm2			village	Azaguié
4	0	0	0	0		key:	Age	age of individual in years
2	0	1	0	0			Smx	S. mansoni egg count of Kato-Katz slide of sample x
3	0	0	0	3			Hwx	Hookworm egg count of Kato-Katz slide of sample x
3.7	0	0	0	0
4	0	5	0	0
4	0	0	0	0
2.9	0	0	0	0
3	0	0	0	0
5	0	0	0	1
5	0	0	0	0
5	0	1	0	0
2	0	0	0	0
3	0	0	0	0
3	0	0	0	0
2	0	0	0	0
2	0	0	0	0
4	0	0	0	0
5	0	0	0	0
2	0	0	0	0
2	0	0	0	0
2	0	0	0	1
1.8	0	0	0	0
5	0	1	0	1
5	0	25	0	6
3	0	8	0	4
1.1	0	0	0	0
2	0	0	0	0
1.9	0	0	0	0
2	0	0	0	0
4	0	10	0	0
2	0	1	0	0
3	0	0	0	0
0.8	0	0	0	0
3	0	0	0	0
4	0	22	0	0
1	0	0	0	0
2	0	0	0	2
2.8	0	0	0	0
3	0	0	0	0
3	0	0	0	2
2	0	0	0	0
3	0	0	0	0
3	0	0	0	0
1	0	0	0	0
0.9	0	0	0	0
5	0	2	0	2
3	0	0	0	0
2	0	0	0	0
3	0	0	0	0
1	0	0	0	0
0.3	0	0	0	0
4	0	5	0	7
5	0	1	0	2
2	0	0	0	0
4	0	0	0	0
3	0	0	0	0
4	0	0	0	0
0.9	0	0	0	0
0.9	0	0	0	0
1.3	0	0	0	0
2.6	0	0	0	0
5	0	0	0	0
3	0	0	0	0
4	0	0	0	0
5	0	0	0	0
1.6	0	0	0	0
5	0	0	0	0
3	0	1	0	0
3	0	0	0	0
1	0	0	0	0
3	0	0	0	0
3	0	0	0	0
5	1	0	0	1
3	0	0	0	0
5	0	1	0	0
4	0	3	0	0
3	0	0	0	0
3	0	0	0	0
2	0	0	0	0
5	0	0	0	0
2	0	0	0	0
4	0	1	0	0
1	0	0	0	0
4	0	9	0	1
4	0	2	0	3
1.6	0	0	0	0
4	0	11	0	22
4	0	0	0	0
2	0	0	0	0
1	0	0	0	0
2	0	0	0	0
5	0	0	0	0
3	0	0	0	0
4	0	0	0	0
2	0	0	0	0
1	0	0	0	0
3	0	0	0	0
0.5	0	0	0	0
3	0	0	0	0
5	0	21	0	8
3	0	0	0	0
2.11	0	0	0	0
5	0	0	0	0
4	0	0	0	0
3	0	0	0	0
2	0	0	0	0
1	0	0	0	0
3	0	0	0	0
	0	0	0	0
4	0	0	0	0
59	1	0	0	0
21	0	8	0	60
36	0	0	0	0
8	0	2	0	3
36	5	0	8	0
28	0	5	0	4
6	0	0	0	0
7	0	3	0	0
19	0	1	0	5
35	0	18	0	0
8	0	0	0	31
59	0	0	0	0
50	0	0	0	0
37	0	1	0	0
6	0	0	0	1
48	0	0	0	4
24	0	1	0	0
10	0	0	0	0
68	0	0	0	0
28	0	7	0	3
10	0	9	0	6
7	0	0	0	0
28	0	0	0	0
9	0	0	0	0
7	0	2	0	17
37	0	13	0	4
26	0	2	0	1
12	0	0	0	0
32	0	0	0	0
25	0	1	0	5
49	22	2	7	1
20	0	30	0	28
8	0	0	0	0
20	0	18	0	7
23	8	0	2	0
18	0	4	0	30
65	0	3	0	5
52	0	0	0	0
48	11	4	11	4
48	1	2	0	0
39	0	0	2	4
6	0	0	0	0
6	0	3	4	1
6	0	0	0	0
42	0	0	2	1
25	0	2	0	2
9	0	0	0	0
6	0	0	0	0
47	0	0	0	3
65	0	0	0	0
43	15	2	0	2
27	7	2	0	0
6	0	0	0	0
33	12	1	14	2
14	0	0	0	0
29	0	0	0	0
19	0	14	0	28
10	0	2	0	1
68	0	0	0
37	0	0	4	1
17	0	0	0	1
25	0	6	0	5
28	0	0	0	0
9	0	0	0	0
27	0	1	0	0
31	39	8	0	12
14	0	0	0	1
9	0	4	0	2
18	0	0	0	0
25	0	0	0	19
41	17	9	51	12
23	0	0	0	0
56	0	8	0	2
43	4	6	8	10
10	271	42	481	12
8	0	0	0	0
29	0	0	12	0
7	0	8	0	3
70	0	0	0	4
42	0	0	0	0
42	0	3	0	11
35	11	0	16	0
62	1	0	4	2
52	1	1	125	4
37	0	0	0	1
7	0	0	0	0
47	0	0	0	0
41	0		0	5
28	0	13	0	15
44	0	0	0	0
12	0	8	0	16
54	0	0	0	0
8	0	0	0	0
15	0	79	0	35
30	0	0	0	0
17	0	0	0	0
18	0	64	0	8
35	0	2	0	6
43	0	0	0	0
30	0	4	0	0
10	0	36	0	42
55	0	0	0	0
45	0	0	0	0
49	0	0	0	0
53	0	0	0	0
23	0	5	0	2
15	0		0	0
18	0	0	0	0
42	0	0	0	0
64	0	0	0	0
28	0	0	0	0
10	0	6	0	2
35	0	0	0	0
12	0	2	0	4
8	0	7	0	18
38	0	0	0	0
36	0	3	29	0
32	17	0	46	2
35	0	0	0	1
63	0	0	23	0
12	0	7	0	44
38	0	0	0	1
43	0	0	10	0
33	0	0	0	13
6	0	0	0	0
66	33	0	26	0
34	0	0	0	0
30	0	0	0	0
31	0	21	0	11
53	0	0	0	0
12	0	3	0	0
30	0	14	0	8
4	17	5	108	51
4	0	0	0	0
5	0	0	0	0
3	0	0	0	0
5	0	10	0	14
3	0	0	0	0
1	0	0	0	0
1.2	0	0	0	0
5	0	0	0	0
5	0	0	0	0
3	0	0	0	0
4	0	12	0	36
3.6	0	2	0	11
2.3	0	0	0	0
4	0	0	0	0
1.6	0	0	0	0
4	0	0	0	0
5	0	0	0	0
3	0	0	0	0
1.6	0	0	0	0
2	0	0	0	0
2	0	0	0	0
0.3	0	0	0	0
0.3	0	0	0	0
1.1	0	0	0	0
4	0	0	0	0
1.1	0	2	0	0
0.8	0	0	0	0
3	0	0	0	0
5	0	0	0	0
5	0	0	0	0
4	0	1	0	1
2	0	0	0
4	0	0	0	0
1	0	0	0	0
2	0	0	0	0
5	0	0	0	0
3	0	0	0	0
4	0	0	0	0
5	0	0	0	0
2	0	0	0	0
4	0	0	0	0
4	0	0	0	0
4	0	0	0	0
5	0	0	0	0
1.3	0	0	0	0
5	0	7	0	2
5	0	0	0	0
5	0	0	0	0
1	0	0	0	0
5	0	0	0	0
5	0	0	0	0
2	0	0	0	0
5	0	4	0	11
4	0	25	0
0.8	0	0	0	0
3.5	0	0	8	0
5	0	0	0	0
5	0	0	0	0
3	0	0	0	0
5	0	0	0	0
5	0	0	0	0
5	0	0	0	0
5	0	0	0	0
5	0	3	0	2
4	0	0	0	0
5	0	0	0	0
3	0	0	0	0
4	0	0	4	0
4	0	1	0	5
1.1	0	0	1	0
4	0	0	0	0
4	0	0	0	0
2	0	0	0	0
4	0	0	0	0
5	0	0	0	0
5	0	0	0	0
2	0	0	0	0
5	0	0	0	0
5	0	0	0	0
5	0	0	0	0
1.4	0	0	0	0
5.5	0	0	0	0
5	0	0	0	0
3	0	0	0	1
1.1	0	0	0	0
1	0	0	0	0
1.6	0	0	0	0
5	0	0	0	0
3.5	0	0	0	0
1.8	0	0	0	0
5	0	0	0	0
4.1	0	0	0	0
4	0	0	0	0
4	0	0	0	1
4	0	32	0	1
3	0	0	0	0
1.6	0	0	0	0
5	0	0	0	0
4	0	0	0	0
2	0	0	0	0
1.1	0	0	0	0
5	0	0	0	0
3	0	0	0	0
3	0	0	0	0
3	0	0	0	0
5	0	0	0	1
2	0	0	0	0
4	0	0	0	0
1.11	0	0	0	0
1	0	0	0	0
3	0	0	0	0
1.6	0	0	0	0
3.8	0	0	0	0
1.4	0	0	0	0
2.2	0	0	0	0
4.5	0	0	0	0
5	1	32	16	5
4	0	0	0	0
2.6	0	0	0	0
1.8	0	0	0	0
5	0	0	0	0
4	0	0	0	0
1.5	0	0	0	0
2	0	0	0	0
2	0	1	0	1
5	0	8	0	4
3	0	0	0	0
1	0	0	0	0
2.5	0	0	6	0
2.5	0	0	0	0
4	0	0	0	0
0.8	0	0	0	0
4	0	0	0	0
14	0	0	0	0
12	0	1	0	2
26	0	0	0	0
36	0	0	0	0
33	14	0	14	0
12	0	6	0	0
24	0	0	0	18
8	0	0	7	2
6	1	0	11	5
54	0	1	8	4
10	0	0	0	0
47	0	0	0	0
38	0	0	0	0
19	0	0	0	0
47	0	0	0	0
6	0	0	0	0
51	0	41	0	19
15	0	1	16	0
12	1	0	0	0
26	0	0	0	0
30	0	1	26	5
34	0	0	0	0
59	0	0	0	0
42	0	11	38	38
30	0	0	0	0
18	0	5	27	27
6	0	7	19	19
22	0	0	0	0
62	0	0	0	0
31	0	3	11	0
16	0	2	0	0
50	0	7	0	26
38	0	1	0	0
18	0	6	0	9
45	0	0	0	0
7	0	0	0	0
8	0	0	0	0
15	11	27	13	24
35	0	0	0	0
40	5	0	3	1
25	0	0	0	0
21	17	0	3	1
45	26	0	10	0
8	0	0	0	0
55	0	0	0	3
17	0	31	0	13
51	0	0	9	0
61	0	0	0	0
30	0	0	0	0
6	0	0	0	1
33	0	0	0	0
6	0	0	0	0
29	0	14	0	16
6	0	13	0	24
76	0	0	0	0
53	0	0	0	1
24	0	21	0	0
6	0	0	0	3
44	0	19	0	5
34	0	2	0	0
11	0	26	0	8
43	7	6	0	11
13	0	5	0	14
23	0	7	0	4
6	0	3	0	2
50	0	0	0	0
40	0	0	0	0
8	0	3	0	3
60	0	0	0	0
30	0	0	0	0
27	0	0	0	0
9	0	0	0	0
59	2	0	0	9
57	0	0	0	0
9	0	3	0	7
12	0	0	0	0
9	0	0	0	0
7	0	0	0	0
9	0	0	0	0
35	0	0	0	2
11	0	0	0	0
9	0	0	0	0
12	0	0	0	0
16	0	0	0	4
9	0	0	0	0
9	0	0	0	0
7	0	0	0	0
77	0	9	0	15
40	0	2	0	0
33	0	48	3	5
16	0	13	0	8
12	4	0	16	0
54	0	0	0	0
42	0	3	0	2
38	0	6	0	12
13	0	0	0	0
27	4	1	0	0
28	0	0	0	7
8	0	1	0	0
34	0	0	0	0
13	0	0	0	5
10	0	0	0	0
9	0	4	0	36
55	0	0	0	0
10	0	14	0	56
7	0	8	0	14
25	0	0	0	0
30	0	0	14	0
28	0	0	0	0
12	0	6	0	7
35	0	0	0	0
8	0	0	0	0
7	0	0	0	0
82	0	0	0	0
51	0	2	16	0
33	0	19	0	4
58	0	0	0	3
37	0	0	0	0
40	0	4	9	1
30	0	33	0	1
22	0	24	0	45
16	0	2	0	21
13	0	0	0	0
28	0	0	0	0
50	0	0	0	0

## Sheet: Fagnampleu
Age	Sm1	An1	Sm2	An2	Sm3	An3	Sm4	An4			village	Fagnampleu
6	0	0	4	0	4	0	2	0		key:	Age	age of individual in years
8	1	1	0	22	0	0	0	0			Smx	S. mansoni egg count of Kato-Katz slide of sample x
6	0	0	0	0	0	0	0	0			Anx	Hookworm egg count of Kato-Katz slide of sample x
7	0	0	0	0	0	0	0	0
6	0	0	0	0	0	0	0	0
7	0	0	0	0	0	0	0	0
6	0	0	0	0	0	0	0	0
7	0	6	0	17	0	0	0	0
7	0	0	0	0	0	0	0	0
7	2	0	0	0	2	0	0	0
6	0	0	0	0	0	0	0	0
6	0	0	0	0	0	0	0	0
7	0	0	0	9	0	1	0	0
7	0	87	6	236	0	58	1	0
7	5	11	29	7	1	2	5	0
7	0	0	0	0	0	0	1	0
6	0	6	0	0	0	0	0	2
8	1	0	0	3	0	0	0	0
6	0	9	0	0	0	0	0	0
6	0	0	0	0	0	0	0	0
7	4	0	0	0	0	9	0	0
7	0	0	0	0	0	0	0	0
7	0	0	0	0	1	0	0	0
7	0	0	5	0	9	0	0	0
7	0	9	0	0	0	0	0	4
7	3	38	2	0	0	10	0	0
7	0	0	0	0	0	0	0	0
7	0	15	0	0	0	25	0	0
6	0	1	13	0	0	0
8	0	0	0	0	0	0	0	0
6	9	26	23	0	36	25	9	0
7	2	0	0	0	10	0	0	0
7	0	27
7	4	1	0	0	32	0	8	0
7	0	0	0	0	1	0	0	0
8	3	0	2	0	23	48	0	0
7	6	0	8	0	32	0	8	0
7	0	0	3	0	0	0	0	0
6	1	75	0	0	2	0	0	0
7	0	0	0	0	0	0	0	0
6	0	0	0	0	2	0	0	0
7	1	6	0	68	3	0	0	0
8	4	34	19	0	3	0	0	0
7	2	4	0	10	6	0	0	0
8	2	0	5	0	0	0	12	0
7	3	0	0	0	0	0
7	0	0	0	0	0	0
7	0	0	0	1	0	0	0	0
7	4	0	21	0	2	0	22	0
7	0	0	0	0	0	0	0	0
8	0	1	0	20	0	163	1	4
7	14	0	1	0	1	0
6	0	8	0	6	1	0	2	4
7	0	0	0	0	0	0	0	0
7	0	0	0	0	0	0	2	0
8	0	5	0	6	0	24	0	0
7	0	5	0	20	0	0	0	0
8	17	0	22	0	19	0	1	0
7	34	0	0	0	0	0	0	0
7	0	0	0	2	3	0	0	0
7	4	0	4	0	0	0	1	0
7	9	7	5	0	3	11	3	4
7	0	0	0	4	1	0	0	1
6	0	0	0	0	0	0	0	0
8	0	0	0	0	0	0	0	0
8	0	0	0	0	0	0	0	0
6	0	0	0	0	0	0	0	0
8	0	101	0	0	0	147	0	0
7	0	0	0	0	0	0	0	0
9	0	0	0	0	0	0	0	0
7	0	0	0	0	7	0	0	0
9	2	173	0	197	3	10	0	15
8	0	63	0	11	0	0	0	0
8	87	0	4	0	2	0	0	0
8	0	0	0	0	0	0
8	7	0	19	0	1	0	0	0
8	3	34	1	10	3	6	0	0
6	0	0	0	0	0	0	2	0
8	0	61	0	70	0	5	0	0
8	0	11	0	2	0	1	0	0
8	1	2	2	6	0	0	9	18
7	1	27	2	58	0	7	1	1
8	24	105	4	25	1	8	7	0
6	7	0	6	0	13	0	8	0
8	25	1	13	2	16	10
9	0	44	8	57	0	20	2	0
7	3	15	3	27	1	6	1	0
8	0	1	5	20	1	0	0	0
9	0	0	0	0	0	0	2	0
8	25	0	4	0	6	0	21	0
8	0	0	1	0	1	0	2	0
7	9	0	3	0	10	0	2	0
8	2	7	0	0	1	4	1	0
8	0	0	0	0	0	2	0	0
7	0	0	0	0	0	0	0	0
7	4	0	77	0	18	0	98	0
9	9	0	57	7	0	0	11	0
8	6	2	0	0	28	0
8	5	0	0	0	0	0	2	0
8	0	0	5	25	4	0	7	17
9	17	42	2	2	0	14	8	0
7	0	0	0	0	6	0	0	0
9	16	8	45	7	6	0	13	0
9	23	0	6	0	21	0	0	0
8	0	0	0	0	0	0	0	0
7	0	0	0	0
8	0	21	0	13	0	9	0	0
8	26	0	0	0	1	0	3	0
8	14	0	6	0	0	0	8	0
9	23	2	64	142	22	0	32	0
8	2	0	3	0	0	1	22	0
8	0	0	0	0	0	0	0	0
7	3	39	2	27	1	0	1	0
7	5	0
8	0	6	0	9	0	4	0	0
8	9	6	0	3	0	0	0	5
9	12	4	4	14	16	0	7	0
8	0	0	39	0	32	0	1	0
7	0	0	2	0	0	0	0	0
7	0	0	0	0	0	0	0	0
8	1	9	1	2	1	0	3	0
8	0	0	5	0	0	0	0	0
8	0	0	2	0	0	2	0	0
6	0	0	0	36	0	4	0	0
7	0	0	0	0	0	0	0	0
7	0	6	0	45	0	0	1	0
8	0	0	38	27	79	8	57	0
7	2	20	2	5	2	3	5	0
8	0	0	0	0	0	0	0	0
8	2	0	2	0	0	0
10	192	10	25	0	171	10	118	0
7	0	5	2	0	1	0	7	0
8	12	74	22	8	12	73	14	0
9	0	202	0	15	0	45	0	0
8	0	11	0	15	13	0	6	0
8	0	0	0	0	0	0	0	0
7	0	0	0	0	0	0	0	0
8	10	0	0	0	1	0	0	0
7	80	23	15	6	36	9	29	27
8	8	0	0	5	2	6	0	107
10	7	0	0	1	1	0	8	0
8	29	11	92	76	11	5	1	0
11	0	2	0	0	0	1	0	0
9	1	2	1	0	0	0
10	4	10	2	8	3	0	8	13
7	3	1	3	0	10	0	0	0
8	13	0	14	0	2	0	6	0
10	7	0	0	0	1	0	0	0
10	0	0	0	0	3	0	0	0
11	0	2	0	0	0	3	20	0
9	0	0	0	0	0	0	0	0
8	0	44	7	428	4	11	1	0
8	6	3	10	20	11	0	9	0
10	2	6	2	6	0	15	0	0
9	0	0	0	0	1	0	6	0
9	1	11	1	3	1	8	0	0
10	0	0	0	0	0	0	0	0
8	3	0	14	0	21	37	27	0
8	3	0	2	0	10	0	5	26
8	0	9	13	4	0	3	1	0
10	36	13	0	1	2	0	5	0
9	0	0	0	1	0	0	0	0
11	5	3	30	0	12	0	26	4
11	16	5	17	0	30	0	45	208
10	32	0	27	6	60	6	38	0
9	1	1	11	8	3	17	7	6
10	4	2	5	2	11	0	0	0
8	129	0	61	0	52	7	104	0
9	105	43	83	11	5	1	22	0
8	0	0	0	0	0	0	11	0
8	0	0	1	0	2	0	0	0
11	6	78	0	2	2	189	4	49
8	5	0	0	0	5	0	4	0
9	0	0	0	15	0	14	0	0
10	43	2	20	0	10	0	35	0
8	0	0	0	0	1	0	0	0
12	153	58	175	48	41	0	22	4
8	0	43	5	37	0	0	0	80
7	0	2	0	0	0	0	0	4
9	10	4	9	9	8	7	10	3
8	14	0	79	5	19	4	28	0
10	1	17	6	53	0	7	0	0
9	11	0	6	5	21	0	34	0
8	5	0	0	0	2	0	7	0
11	10	0	51	0	13	0	0	75
11	20	23	14	9	10	52	0	0
10	13	0	13	0	19	0	2	0
9	6	0	5	0	9	0	73	0
11	0	0	3	2	0	0	11	0
9	0	1	0	11	0	0	0	0
10	0	12	0	15	0	6	0	17
9	8	3	14	16	1	1	22	8
10	11	39	20	19	47	68	30	0
9	31	30	1	10	24	69	5	0
8	6	154	12	45	7	0	18	28
10	77	29	2	163	0	0	1	0
8	6	0	40	3	11	0	5	0
9	153	34	187	42	33	0
10	7	22	3	0	6	0	3	0
8	10	13	38	5	42	8	13	0
9	0	46	0	46	0	88	0	65
10	2	0	28	0	0	0	4	0
10	0	15	0	7	0	0	0	7
9	1	0	0	0	1	0	0	0
10	0	0	0	1	0	0	0	17
10	1	0	6	0	0	0
11	24	28	3	5	5	11	37	0
10	3	0	12	0	18	0	7	0
10	1	0	2	0	0	0	0	0
7	3	0	0	0	0	0	0	0
11	13	0	5	0	5	0	2	0
12	3	2	14	3	14	0	5	4
10	1	5	2	6	0	0	0	2
9	2	0	2	0	2	0	2	0
10	0	7	0	0	0	0	0	0
10	0	0	1	12	6	0	0	76
10	0	0	0	0	0	0	0	0
8	0	0	1	7	1	0	0	0
11	14	0	16	0	12	0	209	0
12	4	0	14	8	45	0	0	0
12	50	17	52	0	91	23	58	0
10	2	4	18	40	0	7	8	0
10	2	0	8	0	3	0	12	0
9	36	6	12	2	3	0	9	0
10	10	2	1	0	20	0	122	18
11	3	3	1	0	0	0	9	0
11	0	7	0	4	0	0	1	0
11	138	27	160	48	7	0
10	1	15	1	6	1	4	1	3
11	0	0	2	0	12	0	4	0
9	6	0	0	0	2	0	0	0
10	92	74	95	3	50	2	20	0
12	1	1	20	0	17	6	5	0
10	0	0	0	0	0	0	0	0
10	0	0	0	0	1	0	0	0
11	15	5	13	0	5	0	7	0
11	0	0	0	0	0	0	0	0
10	33	0	235	29	26	0	38	0
10	0	0	0	21	0	4	1	83
11	37	0	4	0	34	5	2	3
9	0	0	0	2	0	0	0	0
12	3	1	4	1	8	0	1	0
11	121	0	34	6	40	0	81	0
9	3	6	6	2	2	7	4	0
9	0	0	0	0	0	0	0	0
9	14	0	5	0	5	0	9	0
10	13	8	10	0	6	0	5	0
10	4	0	16	0	3	0	18	0
10	1	0	7	8	0	8	6	0
12	56	10	102	56	119	6	105	0
11	155	0	204	18	134	2
10	2	0	0	0	11	0	0	0
11	15	81	21	0	7	0
13	2	6	4	0	6	3	2	0
10	0	5	1	0	7	33	0	9
11	1	0	0	0	0	0	0	0
10	0	0	0	1	0	0	2	2
14	0	6	3	9	4	61	2	0
11	8	0	3	0	4	0	1	0
10	15	0	79	0	3	0	8	0
10	76	0	1	0	6	4	14	0
13	2	0	1	0	10	0	1	0
10	4	0	13	0	5	3	0	4
10	9	0	18	2	27	2	4	0
10	24	15	55	0	17	4	13	7
11	2	0	2	0	0	0	5	0
10	0	23	0	26	0	0	0	2
14	12	1	2	0	1	1	2	2
9	5	35	39	3	4	0
11	0	0	6	0	0	0	54	0
13	2	0	9	0	5	0	15	0
10	0	14	0	41	0	16	0	6
11	0	0	7	0	15	0
12	1	118	0	6	3	16	0	0
11	3	0	60	18	15	11	24	0
15	6	8	25	0	19	0
10	0	0	0	0	0	0	0	0
12	0	0	0	0	0	0	0	0
9	1	0	2	0	0	0	2	0
12	18	0	18	0	21	0	9	0
12	10	0	5	0	2	0	22	0
12	18	0	4	0	4	0	2	0
10	24	0	11	2	45	0	5	0
9	0	0	0	0	0	0	0	0
12	0	0	0	0	0	0
10	8	42	34	2	8	33	12	0
12	2	2	0	0	3	5	5	0
11	15	19	63	88	87	31	31	9
10	17	10	8	1	0	0	5	0
10	10	6	8	0	33	0	16	0
10	1	2	8	4	0	6	0	0
11	0	0	0	0	0	0
10	161	0	78	25	8	0	20	0
10	31	0	0	0
14	2	3	5	47	2	6	2	0
13	4	0	3	95
9	1	0	4	8	1	0	3	0
10	14	16	16	37	22	0
12	2	0	15	24	12	5	2	0
10	5	4	135	8	41	11	59	0
9	3	0	22	0	8	0	10	0
10	1	9	5	45	10	0	3	0
10	1	0	0	0	10	0	2	0
11	13	149	10	0	14	21	15	9
10	0	4	0	5	0	0	3	0
11	0	0	0	0	0	0	0	0
14	0	24	0	0	16	0	20	0
11	18	0	2	34	1	6	3	0
13	5	17	2	0	11	0	4	1
14	1	0	1	0	0	0	0	0
14	119	0	18	0	12	0	12	0
12	9	12	3	0	2	6	3	0
11	3	0	2	0	0	0	1	0
13	12	0	53	0	31	0	1	0
12	0	0	0	0	0	0	0	0
13	5	9	0	6	14	25	5	4
14	7	10	26	0	51	0	45	0
12	1	13	3	7	2	4	3	0
14	3	6	7	0	6	0	0	0
13	2	6	0	0	0	0	5	0
11	0	3	0	3	0	18	0	5
12	5	0	11	0	0	0	1	0
12	3	0	0	0	0	0
13	22	0	55	14	21	9	101	39
12	22	4	19	0	29	0	6	0
11	0	20	0	9	0	0	0	0
11	0	0	0	0	0	0	0	0
11	0	0	0	0	0	0	0	0
12	3	0	2	0	0	0	0	0
11	2	0	4	0	3	0	9	0
12	0	0	0	0	0	0	0	0
14	17	8	22	0	6	0	91	0
12	0	0	0	0	1	1	0	0
13	5	0	11	0	9	0	41	3
13	2	0	8	0	5	0	3	0
12	0	0	1	15	0	0	0	5
13	0	0	2	0	4	0	3	0
13	1	3	2	10	6	0	1	5
14	28	5	27	0	9	0	6	7
14	15	0	4	0	9	0	5	0
12	0	0	1	0	0	0	0	0
12	38	14	4	2	12	17	3	0
14	18	26	2	1	23	0	33	0
14	21	123	32	25	10	0	5	8
12	0	0	0	0	0	0	0	0
14	3	0	5	6	9	20	12	44
13	2	0	0	1	6	0	3	0
11	5	0	5	0	4	0
14	3	0	0	0	1	0	0	0
11	3	0	2	0	0	0
12	0	7	0	0	0	0	4	0
11	174	11	117	0	138	0	148	0
13	0	14	0	1	0	0	0	0
12	0	0	1	0	0	0	0	0
